# Supplementary material for: Reference Gene Selection for qPCR Analysis in Schima superba under Abiotic Stress
Source: MDPI journal article supplement (doi:10.3390/genes13101887), 2022-10-18
Supplement: s1 [file s1]

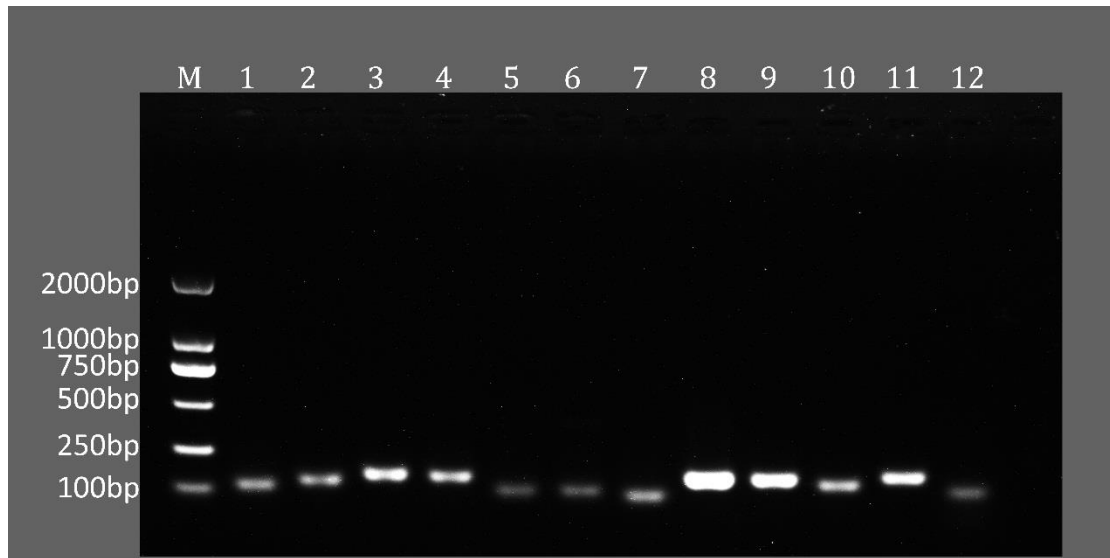

**Figure S2.** Agarose gel electrophoresis analysis of primer specificity. (1.UBQ, 2. UBC4, 3. GAPDH, 4. TUB, 5. GIIa, 6. UDP, 7. UBC20, 8. AP-2, 9. eIF-5a, 10. EF1a, 11.RPL17, 12. Actin)
