# Supplementary material for: Reference Gene Selection for qPCR Analysis in Schima superba under Abiotic Stress
Source: Genes (Basel). 2022 Oct 18;13(10):1887. doi: 10.3390/genes13101887 (PMC9601953; doi:10.3390/genes13101887)
Supplement: Supplementary file 1 [file genes-13-01887-s001.zip]

Archive with 4 entries (4 files):
- Additional file 1 Figure S1.pdf
- Additional file 2 Table S1.xlsx
- Additional file 3 Figure S2.pdf
- Additional file 4 Figure S3.pdf
