# Supplementary material for: Reference Gene Selection for qPCR Analysis in Schima superba under Abiotic Stress
Source: Genes (Basel). 2022 Oct 18;13(10):1887. doi: 10.3390/genes13101887 (PMC9601953; doi:10.3390/genes13101887)
Supplement: Supplementary file 1 [file genes-13-01887-s001.zip › Additional file 2 Table S1.xlsx]

## Sheet: 三线表
Gene name	Product Length (bp)	Forward primer (5'-3')	Reward primer (5'-3')
Actin	80	TTGTCCGTGACATGAAGGAA	GAGCTGCTCTTTCGCAGTCT
AP-2	148	AAAGTGCTACTAAGTTGCGG	TCTGCTGAGTTATGATCCACA
EF1a	119	TGGTGGCTTTGAAGCTGGT	GAGTGGTAGCATCCATCTTATTGC
elF-5a	148	TGATGTTCCTCATGTCAACCGT	GCCATCCTTGATCTGGGACA
GAPDH	142	GACTGTGGATGGCCCTTCAA	GAAGGCCATTCCTGTGAGCT
GIIa	79	TTGGGCTCTCAAAGTGGTTC	AAGCCACTGAGTTCCTGAAG
RPL17	150	CCTTTACACGCTTTTGTCGGG	CCAAACCTTTCACCTCGGCA
TUB	133	GGCAAAATGGGGCAGGAAAC	TGGCATATTTGGAACCCTTGT
UBC20	75	CGCCGATACTCAGTCTGTTCT	ATCCCAGAATCACCACTCATCATT
UBC4	116	GTGTGTGGAGGGTCAAGGTG	ACAAACTGCGCCTGACATCT
UBQ	106	ACAACCCTCAGATGCGTGAA	TCAGGGTTTCTCGTGGCTTC
UDP	93	ACATATGGCTTTAGTTTTGCTACA	GATGTACCCCAGCCACCTAAG
