# Supplementary figures and images for: Reference Gene Selection for qPCR Analysis in Schima superba under Abiotic Stress
Source: MDPI journal article supplement (doi:10.3390/genes13101887), 2022-10-18

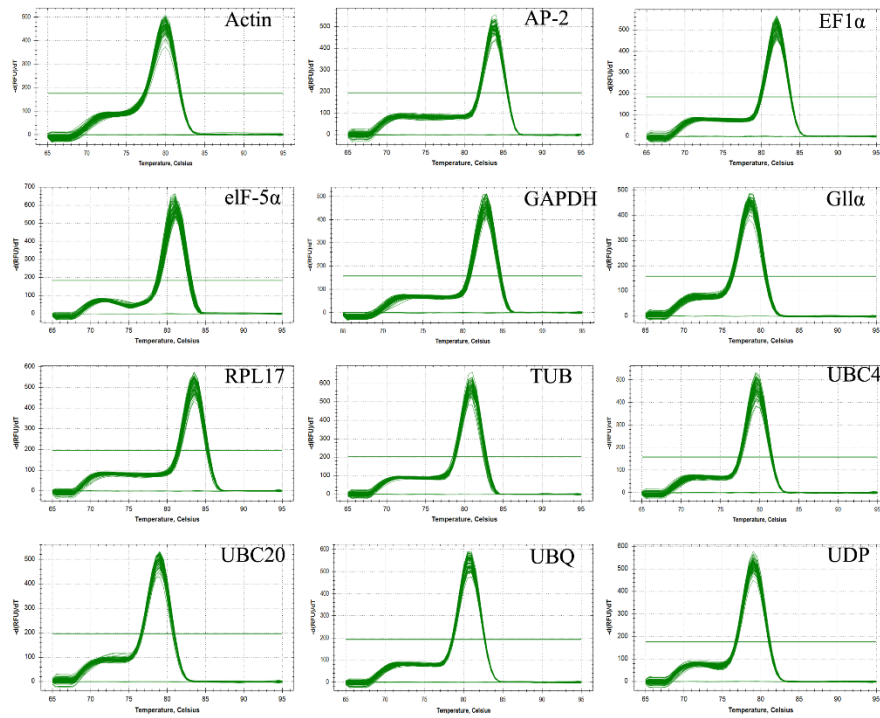

**Figure 3.** Melting curve analysis of twelve reference genes.

Supplement: s1 [file s1]

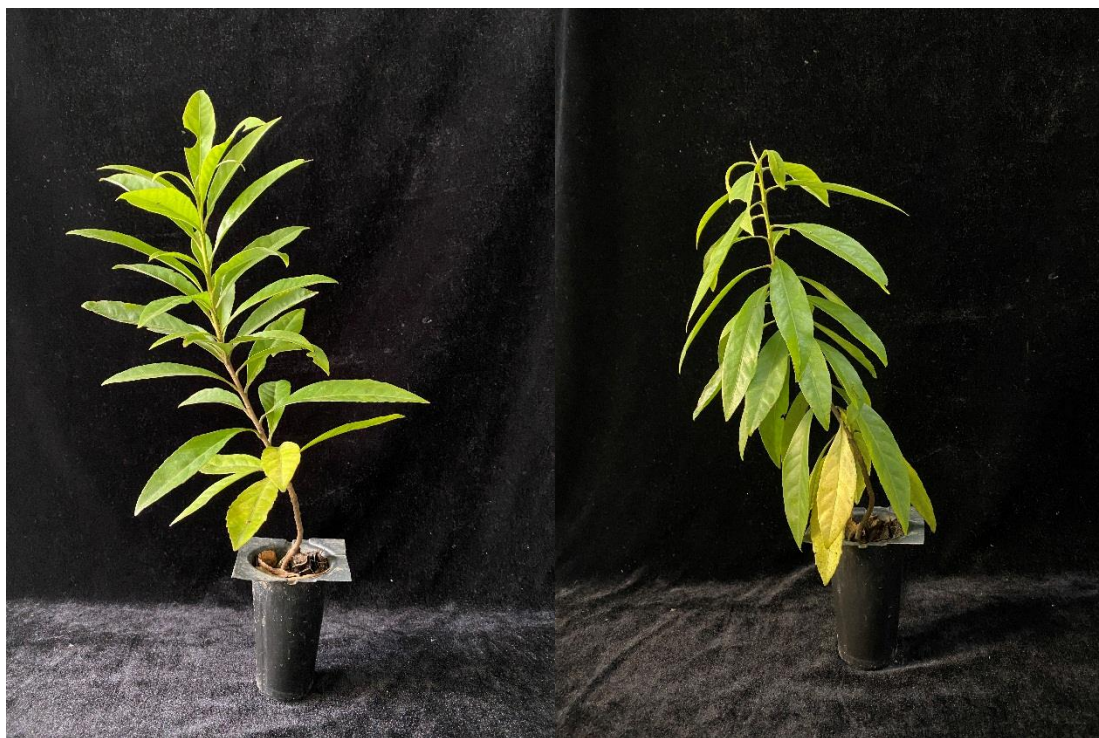

**Figure S1.** Normal appearance and samples under drought stress conditions of *Schima sperba*.

Supplement: s1 [file s1]
